# 1 Individual bat viromes reveal the co-infection, 2 spillover and emergence risk of potential zoonotic 3 viruses

4  
5 Jing Wang<sup>1,a</sup>, Yuan-fei Pan<sup>2,a</sup>, Li-fen Yang<sup>3,a</sup>, Wei-hong Yang<sup>3</sup>, Chu-ming Luo<sup>4</sup>, Juan Wang<sup>3</sup>,  
6 Guo-peng Kuang<sup>3</sup>, Wei-chen Wu<sup>1</sup>, Qin-yu Gou<sup>1</sup>, Gen-yang Xin<sup>1</sup>, Bo Li<sup>5</sup>, Huan-le Luo<sup>4</sup>, Yao-  
7 qing Chen<sup>4</sup>, Yue-long Shu<sup>4</sup>, Deyin Guo<sup>1,6</sup>, Zi-Hou Gao<sup>3</sup>, Guodong Liang<sup>7</sup>, Jun Li<sup>8</sup>, Edward C.  
8 Holmes<sup>9,\*</sup>, Yun Feng<sup>3,\*</sup>, Mang Shi<sup>1,\*</sup>

9  
10 <sup>1</sup>The Centre for Infection and Immunity Studies, School of Medicine, Shenzhen Campus of  
11 Sun Yat-sen University, Sun Yat-sen University, Shenzhen, China.

12 <sup>2</sup>Ministry of Education Key Laboratory of Biodiversity Science and Ecological Engineering,  
13 National Observations and Research Station for Wetland Ecosystems of the Yangtze Estuary,  
14 Institute of Biodiversity Science and Institute of Eco-Chongming, School of Life Sciences,  
15 Fudan University, Shanghai, China

16 <sup>3</sup>Department of Viral and Rickettsial Disease Control, Yunnan Provincial Key Laboratory for  
17 Zoonosis Control and Prevention, Yunnan Institute of Endemic Disease Control and  
18 Prevention, Dali, Yunnan, China.

19 <sup>4</sup>School of Public Health (Shenzhen), Shenzhen campus of Sun Yat-sen University, Sun Yat-  
20 sen University, Shenzhen, China.

21 <sup>5</sup>Yunnan Key Laboratory of Plant Reproductive Adaptation and Evolutionary Ecology and  
22 Centre for Invasion Biology, Institute of Biodiversity, School of Ecology and Environmental  
23 Science, Yunnan University, Kunming, Yunnan, China

24 <sup>6</sup>Guangzhou National Laboratory, Guangzhou International Bio-Island, Guangzhou,  
25 Guangdong Province, China.

26 <sup>7</sup>State Key Laboratory of Infectious Disease Prevention and Control, National Institute for Viral  
27 Disease Control and Prevention, Chinese Center for Disease Control and Prevention, Beijing,  
28 China.

29 <sup>8</sup>Department of Infectious Diseases and Public Health, Jockey Club College of Veterinary  
30 Medicine and Life Sciences, City University of Hong Kong, Hong Kong, China.

31 <sup>9</sup>Sydney Institute for Infectious Diseases, School of Medical Sciences, The University of  
32 Sydney, Sydney, NSW 2006, Australia.

33

34

35 <sup>a</sup>These authors contributed equally

36 \*Corresponding authors: Edward C. Holmes ([edward.holmes@sydney.edu.au](mailto:edward.holmes@sydney.edu.au)); Yun Feng  
37 ([ynfy428@163.com](mailto:ynfy428@163.com)); and Mang Shi ([shim23@mail.sysu.edu.cn](mailto:shim23@mail.sysu.edu.cn))

38

39 Running Title: Comparisons of individual bat virome

40 **ABSTRACT**

41 Bats are reservoir hosts for many zoonotic viruses. Despite this, relatively little is known about  
42 the diversity and abundance of viruses within bats at the level of individual animals, and hence  
43 the frequency of virus co-infection and inter-species transmission. Using an unbiased meta-  
44 transcriptomics approach we characterised the mammalian associated viruses present in 149  
45 individual bats sampled from Yunnan province, China. This revealed a high frequency of virus  
46 co-infection and species spillover among the animals studied, with 12 viruses shared among  
47 different bat species, which in turn facilitates virus recombination and reassortment. Of note,  
48 we identified five viral species that are likely to be pathogenic to humans or livestock, including  
49 a novel recombinant SARS-like coronavirus that is closely related to both SARS-CoV-2 and  
50 SARS-CoV, with only five amino acid differences between its receptor-binding domain  
51 sequence and that of the earliest sequences of SARS-CoV-2. Functional analysis predicts that  
52 this recombinant coronavirus can utilize the human ACE2 receptor such that it is likely to be of  
53 high zoonotic risk. Our study highlights the common occurrence of inter-species transmission  
54 and co-infection of bat viruses, as well as their implications for virus emergence.

55

56 **Keywords**

57 Bats, virome, SARS-CoV-2, meta-transcriptomics, emergence, Yunnan

## 58 INTRODUCTION

59 Bats (order Chiroptera) are hosts for a larger number of virus species than most mammalian  
60 orders<sup>1</sup>, and are the natural reservoirs for several emerging viruses that cause infectious  
61 disease in human<sup>2</sup>. Recently, there has been considerable research effort directed toward  
62 exploring viral diversity in bats as a means to identifying potential zoonotic infections<sup>3</sup>. These  
63 studies have greatly expanded the diversity of known bat-borne viruses and identified an array  
64 of potentially emerging viruses. However, despite the growing body of work on bat viruses,  
65 little is known about the underlying drivers of virus diversity within these animals, nor of the  
66 extent patterns of viral co-infection and the frequency of viral spillover among bat species<sup>4,5</sup>.

67 Current virus discovery studies typically pool individual bats by species or by sampling location  
68 (e.g., ref <sup>6,7</sup>). Although of great utility, this hinders mechanistic insights due to insufficient  
69 resolution. As such, studying the bat virome at the scale of individual animals can help us  
70 better understand the diversity and emergence of bat-borne viruses<sup>4</sup>. For example, the co-  
71 infection of phylogenetically related viruses within an individual host facilitates the occurrence  
72 of recombination<sup>8</sup>, which may in turn have contributed to the emergence of a number of  
73 zoonotic viruses (e.g. SARS-CoV<sup>9</sup>). Importantly, the frequency of virus co-infection in bats can  
74 be resolved through the study of the viromes of individual animals. Resolution at the scale of  
75 individual animals is also required to better understand the frequency and determinants of  
76 virus spillover among bats<sup>4,10</sup>. For example, correlating host traits at the individual level with  
77 the probability of cross-species transmission is an important way to reduce confounding  
78 effects.

79 Many previous studies of bat viruses have preferentially targeted relatives of known human  
80 pathogens<sup>3</sup>. Although time and cost-effective, this necessarily limits our ability to discover  
81 novel zoonotic viruses. In contrast, other studies have utilized metagenomics approaches to  
82 explore the total bat virome (e.g., ref <sup>7</sup>), with meta-transcriptomic sequencing demonstrating  
83 great utility as a means to characterise the total diversity of viruses without *a priori* knowledge  
84 of which viruses are present<sup>11,12</sup>.

85 Yunnan province in southwestern China has been identified as a hotspot for the diversity of bat  
86 species and bat-borne viruses. A number of highly pathogenic viruses have been detected  
87 there, including close relatives of SARS-CoV-2, such as bat viruses RaTG13<sup>13</sup>, RpYN06<sup>14</sup>, and  
88 RmYN02<sup>15</sup>, as well as relatives of SARS-CoV, such as WIV1<sup>16</sup> and Rs4231<sup>17</sup>. It has been  
89 hypothesized that the presence of mixed roosts of bats in Yunnan (i.e., multiple bat species  
90 occupying the same roost) contributes to the frequent cross-species transmission of viruses,  
91 promoting their recombination and ultimately leading to transient spillovers or successful cross-  
92 species transmissions<sup>17</sup>. Thus, wild bat populations in Yunnan provide a unique opportunity to  
93 study the diversity, spillover and emergence risk of bat-borne viruses.

94 We performed intensive field sampling of individual wild bats in Yunnan province, China. In  
95 particular, we characterised the total mammal-associated virome of wild bats at the scale of  
96 individual animals using unbiased meta-transcriptomic sequencing. We then explored the

97 cross-species transmission of viruses among individual animals from different species and  
98 quantitatively tested how host phylogeny and geographic (i.e. sampling) location may impact  
99 the probability of cross-species transmission. Finally, we identified viruses of potentially high  
100 emergence risk and evaluated their pathogenic potential using a combination of phylogenetic  
101 analysis and *in silico* molecular dynamics simulations.

## 102 RESULTS

### 103 Characterization of the bat viromes

104 Between 2015 and 2019, rectum samples were collected from 149 individuals of bat in six  
105 counties/cities, Yunnan province, China, representing six genera and 15 species (Fig. 1; Table  
106 S1). Total RNA was extracted and sequenced individually for each individual bat. Meta-  
107 transcriptomic sequencing yielded an average of 41,789,834 clean non-rRNA reads for each  
108 animal. In total, 1,048,576 contigs were *de novo* assembled from non-rRNA reads, among  
109 which the 36,029 contigs annotated as viruses were used for virome characterization.

110 We focused on characterizing the mammal-associated viromes of bats (Fig. 2), which include  
111 the RNA and DNA viral families or genera that are known to infect mammalian hosts (rather  
112 than those viruses more likely associated with bat diet or microbiome). In total, we identified 41  
113 mammal-associated virus species belonging to 11 families (Table S2). Most of the viruses  
114 detected were RNA viruses, comprising 32 of the 41 viral species. The *Reoviridae* was the  
115 most prevalent viral family, present in 27.5% of individuals sampled, followed by the  
116 *Picornaviridae* (12.1%) and the *Coronaviridae* (8.7%) (Fig. 3C). The prevalence of the  
117 remaining viral families was relatively low ( $\leq 4\%$ ).

118 We next quantified the virus load and number of virus species for each individual bat (Fig. 3).  
119 Of the 149 individual bats analysed, 70 were positive for at least one virus species (positive  
120 rate 47.0%). We consider those with relatively high viral load (reads per million total reads  $> 1$ )  
121 as true positives. Among positive individuals, one-third were infected by more than one viral  
122 species (1.5 viral species per individual on average). The number of virus species per  
123 individual was uneven among host genera (Fig. 3B). We used Poisson regression to estimate  
124 the effect of host genera on the number of virus species. This revealed that *Rhinolophus* bats  
125 carried significantly more virus species per individual than average, whereas *Aselliscus* bats  
126 carried significantly less.

### 127 Cross-species transmission of viruses among bats

128 We identified 12 virus species that are shared among different bat species, accounting for the  
129 possibility of index-hopping (Fig. 4A). The 12 species identified belong to the *Coronaviridae* (4  
130 species), *Reoviridae* (3), *Picornaviridae* (3), *Parvoviridae* (1) and *Polyomaviridae* (1). Rotavirus  
131 A type 1 (RVA1) and Mammalian orthoreovirus (MRV) had the broadest host range, being  
132 detected in five and four bat species, respectively, with both these viruses shared among the  
133 bat families Hipposideridae and Rhinolophidae. The remaining 10 viral species were only  
134 found in two bat species, and most were only shared among animals from the same host

135 genus, with the exception of bat coronavirus HKU10 (BtCoV-HKU10, present in *Hi. pomona*  
136 and *Rh. thomasi*) and Bat RVJ-like rotavirus BtSY1 (BtRV1, present in *Hi. larvatus* and *Rh.*  
137 *macrotis*).

138 The number of viral species found in two bat species ranged from zero to three. Partial Mantel  
139 tests showed that more closely phylogenetically related or closely geographically located bat  
140 individuals had more similar virome compositions and had more virus species in common  
141 (Table S4). For example, the viromes of *Rhinolophus* or *Hipposideros* bats form two network  
142 modules, in which individuals within the same genus are more inter-connected (i.e., shared  
143 more viruses) than individuals from different genera (Fig. 4A). A Poisson regression analysis  
144 showed that the number of virus species shared between pairs of bats was significantly  
145 associated with both the phylogenetic and the geographic distance of hosts, after controlling  
146 for the confounding effect of date of sampling (Fig. 4B, C).

#### 147 **Phylogenetic analysis identifies viruses of potentially high emergence risk**

148 Phylogenetic analysis identified five viral species that were closely related to known human or  
149 livestock pathogens, which we termed “viruses of concern” (Fig. 5 and Table S5). The five  
150 viruses of concern belong to two viral families – the *Coronaviridae* (three species) and the  
151 *Reoviridae* (two species). Notably, all the five viruses were detected in more than one bat  
152 species, and their prevalence was relatively high, especially Mammalian orthoreovirus and  
153 Rotavirus A type 1 (Table S5).

154 The three coronaviruses were closely related to highly pathogenic viruses that infect humans  
155 or swine. A phylogenetic analysis using the conserved RdRp protein revealed that both Bat  
156 SARS-like virus BtSY1 and BtSY2 belong to the subgenus *Sarbecovirus* of betacoronaviruses  
157 and are closely related to human SARS-CoV (>90% nucleotide identity). Notably, other key  
158 functional genes (e.g., NTD, RBD, N) of Bat SARS-like virus BtSY2 were more closely related  
159 to SARS-CoV-2 (i.e., the early Wuhan-Hu-1 reference strain), indicative of a past history of  
160 recombination. We present further analysis of the evolutionary history and zoonotic potential of  
161 this virus below. The other coronavirus, which was *Rhinolophus* bat coronavirus HKU2-like,  
162 belonged to the genus *Alphacoronavirus* and was closely related to SADS-CoV of pigs in the  
163 RdRp gene.

164 The remaining two viruses of concern from the *Reoviridae* are known species -Mammalian  
165 orthoreovirus and Rotavirus A type 1. In total, three different types of Rotavirus A were  
166 identified according to the RdRp phylogeny. The nucleotide identity between their RdRp was  
167 less than 80%, so we demarcated them as three different types. Of these, Rotavirus A type 1  
168 was most closely related to human Rotavirus A, while Rotavirus Type 2 and 3 belong to viral  
169 lineages associated with *Eonycteris* and *Rousettus* bats, respectively (Fig. S1).

170 As well as viruses of concern, 28 viral species can be classed as newly discovered viruses of  
171 mammals. The *Picornaviridae* (n = 8) contained the highest number of the newly discovered



172 viral species, followed by the *Astroviridae* (n = 5), *Parvoviridae* (n = 4), and *Caliciviridae* (n =  
173 3).

## 174 **The evolutionary history and zoonotic potential of two SARS-related coronavirus**

175 We next evaluated the evolutionary history and zoonotic potential of the two SARS-related  
176 coronaviruses detected in our samples: Bat SARS-like virus BtSY1 and BtSY2 (for simplicity  
177 referred to as BtSY1 and BtSY2, respectively, in the following text) (Fig. 6). Phylogenetic trees  
178 were estimated using the nucleotide sequences of key genes: the RdRp (RNA-dependent RNA  
179 polymerase), N-terminal domain (NTD) and receptor-binding domain (RBD) of spike protein,  
180 and the nucleoprotein (N). This analysis revealed that in the NTD, RBD and N gene trees,  
181 BtSY1 clustered with SARS-CoV forming an “S-1” clade, while BtSY2 clustered with SARS-  
182 CoV-2 forming the “S-2” clade. Notably, while BtSY1 remained in the S1 clade in the  
183 phylogeny of the RdRp gene, BtSY2 also fell into the S-1 clade. Hence, BtSY2 appears to be a  
184 recombinant between the S-1 and S-2 lineages.

185 At the scale of the whole genome, BtSY1 generally exhibited the highest genetic identity to  
186 human SARS-CoV viruses (93%). Indeed, in comparisons to previously identified SARS-  
187 related viruses (i.e., WIV16, Rs4231), BtSY1 shared highest identity with human SARS-CoV  
188 viruses in ORF1b (nsp13 and nsp15) and the NTD, although it was relatively more distant in  
189 ORF1a and the RBD, as well as in the S2 region of S gene (Fig. 6B). Specifically, it exhibited  
190 98.13% similarity with SARS-CoV in the NTD, but only 88.61% identity in the RBD domain.

191 In marked contrast, BtSY2 shared 92% genetic identity with SARS-CoV-2 at the whole  
192 genome scale, although with the occurrence of recombination. Indeed, we identified potential  
193 recombination at positions 12035-20708bp, which encodes ORF1a (nsp7~nsp11) and ORF1b  
194 (nsp12~nsp14), with this region instead showing strong sequence similarity to SARS-CoV  
195 (92.3%). The remainder of its genome is very similar to SARS-CoV-2, particularly in the region  
196 encoding the NTD and RBD (95.15% and 93.70%, respectively), although no furin cleavage  
197 site was detected in the spike protein (Fig. 6B).

198 To evaluate the human-receptor-binding potential of BtSY2, we inferred the structure of its  
199 RBD using a homology-modelling approach and performed molecular dynamics simulations  
200 (Fig. 6). This revealed that there are only five amino-acid substitutions in the RBD in  
201 comparison to the SARS-CoV-2 strain Wuhan-Hu-1, with three of these located at the interface  
202 of RBD-hACE2 complex (i.e., the receptor-binding motif) (Fig. 6C). Molecular dynamics  
203 simulations further revealed that the binding stability and energy of the RBD-hACE2 complex  
204 are very similar between BtSY2 and SARS-CoV-2 Wuhan-Hu-1 (Fig. 6D), suggesting that  
205 BtSY2 may be able to utilize human ACE2 receptor for cell entry.

## 206 **DISCUSSION**

207 We have characterised the mammalian-associated virome of individual bats. This revealed an  
208 unexpectedly high frequency of co-infection, with approximately one-third of the virus-positive  
209 individuals simultaneously infected by two or more viruses. The frequency of co-infection in

210 individual bats has seldom been investigated, and only a few studies have explored the co-  
211 infection of specific viral species using consensus PCR methods (e.g., paramyxovirus, ref <sup>18</sup>).  
212 As such, this study provides the first empirical evidence for co-infection using an unbiased  
213 omics approach. Co-infection is prerequisite for virus recombination or reassortment<sup>8</sup>, and the  
214 gut microbiome can facilitate the recombination of enteric viruses<sup>19</sup>. Hence, the high frequency  
215 of co-infection observed here suggests that recombination and reassortment are very likely to  
216 happen within individual bats, which in turn may facilitate the emergence of zoonotic viruses<sup>9</sup>.

217 Our results also revealed frequent virus spillover among different bat species, identifying 12  
218 different viral species from different families that infect multiple host species. The ability of  
219 viruses to jump host species boundaries appears to be a near universal trait among viruses<sup>20</sup>.  
220 Our results are of note because they show that the probability of virus spillover among pairs of  
221 host individuals is negatively associated with host phylogenetic and geographic distance,  
222 thereby supporting the hypothesis that phylogenetically related or spatially closely located  
223 hosts share more viruses<sup>21,22</sup>. The frequent virus spillover among phylogenetically related or  
224 spatially co-located bats provides an opportunity for viromes of different bat species to  
225 exchange, further expanding genetic diversity of circulating viruses.

226 We identified two SARS-related coronaviruses in *Rhinolophus* bats (*Rh. marshalli*, *Rh. pusillus*  
227 *Rh. thomasi*, and *Rh. macrotis*) which we suggest are at particular risk for emergence. One of  
228 the SARSr-CoV - Bat SARS-like coronavirus BtSY2 (i.e., BtSY2) - is related to both SARS-  
229 CoV and SARS-CoV-2 and likely to have a history involving recombination. Notably, there are  
230 only five amino acid differences in the receptor-binding domain (RBD) of spike protein of this  
231 virus compared with SARS-CoV-2 strain Wuhan-Hu-1<sup>23</sup>, which makes it the closest relative to  
232 SARS-CoV-2 found in China in this particular genomic region. In contrast, the nsp7~nsp11  
233 proteins of ORF1a and nsp12~nsp14 protein of ORF1b were closely related to SARS-CoV,  
234 indicating that these genes were likely to be acquired from another SARSr-CoV. The  
235 remainder of its genome was closely related to SARS-CoV-2 and to several bat coronavirus  
236 previously found in Yunnan, including RaTG13<sup>13</sup>, RmYN02<sup>15</sup>, and RpYN06<sup>14</sup> that are all close  
237 relatives of SARS-CoV-2. Together, these findings strongly suggest that virus spillover and co-  
238 infection in related bat species contribute to the recombination of potentially pathogenic  
239 coronavirus and could possibly facilitate virus emergence in other species.

240 Functional analysis indicated that Bat SARS-like coronavirus BtSY2 likely has the ability to the  
241 bind human ACE2 receptor, and even has slightly higher affinity than SARS-CoV-2 Wuhan-Hu-  
242 1. Three of the five substitutions in the RBD - Q498H, N501Y and H519N - have been reported  
243 to increase affinity to human ACE2<sup>24</sup>, and notably, the N501Y substitution is present in the  
244 Alpha, Beta, Gamma and Omicron variants of SARS-CoV-2. In addition, we found that the  
245 nsp7~nsp14 proteins (in which nsp12 is the replicase, i.e., RdRp) of BtSY2 were closely related  
246 to those of SARS-CoV. A comparative study showed that SARS-CoV can replicate more  
247 rapidly than SARS-CoV-2 *in vitro*<sup>25</sup>, while another suggested that nsp14 is likely associated  
248 with virulence<sup>26</sup>. Hence, these data tentatively suggest that BtSY2 may be able to replicate



249 rapidly with similar virulence as SARS-CoV. Although this issue merits further consideration,  
250 this virus is potentially of high risk of emergence and so should be monitored carefully.

251 We identified another four viruses of concern, likely to be pathogenic in humans or livestock.  
252 Bat SARS-like virus BtSY1 is closely related to SARS-CoV<sup>27,28</sup>. Rhinolophus bat coronavirus  
253 HKU2-like is closely related to SADS-CoV, which causes severe diarrhea and death in  
254 swine<sup>29,30</sup>, Rotavirus A causes diarrhea in humans<sup>31,32</sup>, while Mammalian orthoreovirus is  
255 known to have a broad host range and cause diarrhea in swine<sup>33,34</sup>. Interestingly, all these  
256 viruses of concern were found in more than one bat species in our samples, suggesting that  
257 these potentially zoonotic viruses may have a broader host range or have a higher rate of  
258 spillover than other viruses.

## 259 **METHODS**

### 260 **Ethics Statement**

261 This research, including the procedures and protocols of specimen collection and processing,  
262 was reviewed and approved by the Medical Ethics Committee of the Yunnan Institute of  
263 Endemic Diseases Control and Prevention. (No. 20160002).

### 264 **Sample collection**

265 A total of 149 rectum samples from bats were collected from six counties/cities in Yunnan  
266 province, China between 2015 and 2019. Bats were trapped using net traps and were primarily  
267 identified according to morphological criteria and confirmed by a barcode gene (COI) in the  
268 meta-transcriptomics analysis. The bats collected belonged to 15 species. The majority were  
269 from the genus *Rhinolophus* (n=54) and comprised *Rhinolophus pusillus* (n=16), *Rhinolophus*  
270 *thomasi* (n=14), *Rhinolophus stheno* (n=12), *Rhinolophus marshalli* (n=7), *Rhinolophus*  
271 *pearsonii* (n=2), *Rhinolophus macrotis* (n=2), and *Rhinolophus affinis* (n=1). The genus  
272 *Hipposideros* (n=26) animals comprised *Hipposideros larvatus* (13), *Hipposideros armiger* (11),  
273 and *Hipposideros pomona* (2). The genus *Rousettus* (n=23) animals comprised *Rousettus*  
274 *leschenaultia* (n=18) and *Rousettus amplexicaudatus* (n=5). The *Aselliscus* (n=35),  
275 *Cynopterus* (n=9) and *Eonycteris* (n=2) genera animals only contained *Aselliscus stoliczkanus*  
276 (n=35), *Cynopterus sphinx* (n=9), and *Eonycteris spelaea* (n=2), respectively. All rectum  
277 samples were collected from each individual bat and then stored at -80°C until use.

### 278 **RNA extraction, library preparation and sequencing**

279 All samples from each individual bat were homogenized using grinding bowls and rods in MEM  
280 medium. The homogenized samples were then centrifuged at 12,000 rpm for 30 min at 4°C to  
281 obtain supernatant. Total RNA extraction and purification were performed using the RNeasy  
282 Plus universal mini kit (QIAGEN) according to the manufacturer's instructions. RNA  
283 sequencing library construction and ribosomal RNA depletion were performed using the Zymo-  
284 Seq RiboFree™ Total RNA Library Kit (Zymo Research). Paired-end (150 bp) sequencing of  
285 the 149 dual-indexed libraries was performed on an Illumina NovaSeq platform.

## 286 **Virus discovery pipeline**

### 287 ***Viral genomes assembly and annotation***

288 Raw paired-end sequence reads were first quality controlled, and rRNA reads were removed  
289 by mapping against the rRNA database downloaded from the SILVA website ([https://www.arb-](https://www.arb-silva.de/)  
290 [silva.de/](https://www.arb-silva.de/)) using Bowtie2. The clean reads were then *de novo* assembled into contigs using  
291 MEGAHIT (version 1.2.8)<sup>35</sup>. We performed a blastx search of contigs against the NCBI nr  
292 database using Diamond (version 0.9.25)<sup>36</sup> to roughly classify the sequences by kingdom. The  
293 e-value was set at 0.001 to achieve high sensitivity while reducing false positives. Those  
294 contigs classified as viruses were used for later analysis. Some viral contigs with unassembled  
295 overlaps were merged using SeqMan in the Lasergene software package (version 7.1)<sup>37</sup>. We  
296 searched for ORFs in each viral genome using the NCBI ORFfinder  
297 (<https://ftp.ncbi.nlm.nih.gov/genomes/TOOLS/ORFfinder/>), with the genetic code set to  
298 standard and with ATG as the only start codon. Then we performed a blastp search against  
299 the nr database and manually annotated the viral contigs according to the results.

### 300 ***Quantification of virus abundance***

301 We quantified the abundance of each virus in each library as the number of viral reads per  
302 million non-rRNA reads (i.e., RPM) by mapping clean non-rRNA reads of each library to the  
303 corresponding contigs. To reduce false positives, we applied an abundance threshold of 1  
304 RPM. We further reduced the number of possible false positives from index hopping using the  
305 same criterion as described in Shi, et al. <sup>38</sup>.

### 306 ***PCR confirmation of virus genomes***

307 The genome sequence of Bat SARS-like virus BtSY2 was obtained and confirmed by PCR  
308 amplification and Sanger sequencing. The WTA product was performed using the Complete  
309 Whole Transcriptome Amplification Kit (WTA2)<sup>39</sup> (Sigma-Aldrich, St. Louis, MO), with the PCR  
310 reaction then undertaken using a set of self-designed primer pairs based on the obtained  
311 reads. To confirm the recombination breakpoints, long fragments were obtained using the  
312 SuperScript IV Reverse Transcriptase and Expand Long Template PCR System.

### 313 ***Viral species demarcation and phylogenetic analysis***

314 Viral species were identified based using sequences of the conserved replicase proteins (RNA  
315 viruses: RdRp, *Polyomaviridae*: LTA<sub>g</sub>, *Anelloviridae*: ORF1 protein, *Parvoviridae*: NS1, and  
316 other DNA viruses: DNA pol). We applied a 90% cut-off of amino acid sequence similarity to  
317 demarcate different virus species. The viruses were aligned using MAFFT (version 7.48)<sup>40</sup> and  
318 ambiguously aligned regions were removed using TrimAl<sup>41</sup>. Phylogenetic trees were then  
319 estimated by the maximum likelihood (ML) approach implemented in PhyML version 3.0<sup>42</sup>,  
320 employing the LG model of amino acid substitution and the Subtree Pruning and Regrafting  
321 (SPR) branch-swapping algorithm. For SARS-related viruses, nucleotide sequences of RdRp,

322 NTD, RBD and N genes were used for phylogenetic analysis, employing the GTR substitution  
323 model.

### 324 **Recombination analysis of SARS-related viruses**

325 The recombination analysis of SARS-related viruses was performed using similarity plots as  
326 implemented in Simplot 3.5.1<sup>43</sup>. The nucleotide sequences of the SARS-related viruses were  
327 analyzed with reference strains obtained from GenBank, comprising SARS-CoV Tor2, SARS-  
328 CoV-2 Wuhan-Hu-1, as well as some of the closest bat SARSr-CoVs identified so far: Rs4231,  
329 WIV16, RaTG13, and BANAL-20-52.

### 330 **Protein structure modelling and molecular dynamics (MD) simulations**

#### 331 ***Homology modelling***

332 We built homology models of the Bat SARS-like virus BtSY2 RBD-hACE2 protein complex with  
333 MODELLER (version 10.3)<sup>44</sup>, using the known structure of a SARS-CoV-2 RBD-hACE2  
334 complex (PDB ID: 6M0J, resolution 2.45 Å)<sup>45</sup> as a template. The similarity between Bat SARS-  
335 like virus BtSY2 RBD and the template was 97.4%. We removed all NAG and water molecules  
336 in the template, and kept the zinc and chloride atoms. We built 100 homology models and  
337 selected the top three models based on normalized DOPE score<sup>46</sup> for the later MD simulations.

#### 338 ***MD simulation***

339 We used the CHARMM-GUI webservice<sup>47</sup> to prepare inputs for MD simulations. The three  
340 homology models described above and a SARS-CoV-2 RBD-hACE2 complex with known  
341 structure (PDB ID: 6M0J) were input to the CHARMM-GUI solution builder pipeline. The four  
342 systems were solvated in a water box of 13.5 nm × 9.2 nm × 8.3 nm, with KCl at the  
343 concentration of 0.15M. We used CHARMM36m force field<sup>48</sup> for protein and ions, and TIP3P  
344 model<sup>49</sup> for water.

345 The models processed by CHARMM-GUI were then used as inputs to GROMACS (version  
346 2022.3)<sup>50</sup> for MD simulations. The following steps were performed sequentially for each model:  
347 (1) energy minimization, (2) 1-ns-long equilibration in NPT ensemble, and (3) 1-ns-long  
348 equilibration in NVT ensemble. The temperature and pressure were set to 300K and 1 atm,  
349 respectively. We then performed production simulations in NVT ensemble. Production  
350 simulation for the top homology model was 1000 ns long, and we performed another two 500-  
351 ns-long simulations for the rest two homology models as replications. Similarly, we performed  
352 one 1000-ns-long production simulation for the SARS-CoV-2 RBD-hACE2 complex (PDB ID:  
353 6M0J) and two 500-ns-long replications. The settings of these simulations were the same as  
354 those described in ref <sup>51</sup>.

#### 355 ***Analysis of the MD data***

356 We performed two sets of analyses on the data retrieved from MD. First, we evaluated the  
357 stability of RBD-hACE2 binding by measuring deviation of the protein backbones (measured  
358 as RMSD) in the duration of simulations, using PLUMED (version 2.7.4)<sup>52</sup>. The backbone

359 RMSD were calculated with respect to energy-minimized structure of each model. We also  
360 calculated RMSD separately for RBD, hACE2 and the RBD-hACE2 interface (residues within  
361 0.8 nm to the other subunit in the 6M0J model). Second, we estimated and compared the  
362 binding energy of RBD-hACE2 complex using FoldX (version 4)<sup>53</sup>. We visualized the structure  
363 of RBD-hACE2 complex using PyMOL (version 2.4.2)<sup>54</sup>.

### 364 **Statistical analysis**

365 All statistical analyses were performed in R (version 4.2.0)<sup>55</sup>

#### 366 ***Comparing the number of virus species per individual between bat genera***

367 To determine whether specific bat genera harbor more virus species per individual than others,  
368 we used a Poisson regression to fit the effect of host genera on number of virus species per  
369 individual. We extracted and visualized the estimated effect size of each host genus and its  
370 95% CI. An effect is considered to be significant if its 95% does not include zero.

#### 371 ***Analysis of cross-species transmission of viruses***

372 To show possible cross-species virus transmission, we visualized the virus-sharing pattern  
373 among different bat species using a bipartite network. In this network, a node is either a host or  
374 a virus species, and an edge linking a host node and a virus node indicates the presence of  
375 that virus in that host. We performed edge betweenness clustering on such network to find  
376 network modules, which are subset of nodes such that connections between these nodes are  
377 denser than outside of the subset, using the igraph package<sup>56</sup> in R. A biological interpretation  
378 of a network module is that host species within the same module shared more viruses than  
379 outside that module.

380 We performed two sets of statistical tests to further quantitatively evaluate cross-species  
381 transmission of viruses among bats. First, we assessed the strength of the correlation of  
382 virome composition with both host phylogeny and geographic location using partial Mantel  
383 tests implemented in the ecodist package<sup>57</sup>. Differences between virome compositions were  
384 represented by Bray-Curtis distance, and phylogenetic distance between hosts was measured  
385 as the sum of branch length of pairs of hosts in the COI gene tree. We then used Poisson  
386 regression to estimate the effects of (1) phylogenetic distance between hosts, and (2)  
387 geographic distance between sample locations on the number of shared virus species  
388 between pairs of hosts, including the time intervals between sampling dates to control for its  
389 confounding effect.

## 390 DATA AND CODE AVAILABILITY

391 All meta-transcriptomic sequencing reads have been deposited in SRA database under the  
392 project accession (accession id here). The viral genome sequences determined here have  
393 been deposited at NCBI GenBank (accession id here). Sample metadata and other materials  
394 required to reproduce our results have been deposited together with code and scripts in a  
395 GitHub repository (<https://github.com/Augustpan/Individual-Bat-Virome>). Viral genome  
396 sequences are temporarily stored in the above GitHub repository for reviewing, until the NCBI  
397 GenBank accessions become available.

398

## 399 REFERENCES

- 400 1 Mollentze, N. & Streicker, D. G. Viral zoonotic risk is homogenous among taxonomic orders of  
401 mammalian and avian reservoir hosts. *Proc Natl Acad Sci U S A* **117**, 9423-9430,  
402 doi:10.1073/pnas.1919176117 (2020).
- 403 2 Hayman, D. T. S. Bats as Viral Reservoirs. *Annual Review of Virology* **3**, 77-99,  
404 doi:10.1146/annurev-virology-110615-042203 (2016).
- 405 3 Van Brussel, K. & Holmes, E. C. Zoonotic disease and virome diversity in bats. *Current Opinion in*  
406 *Virology* **52**, 192-202, doi:<https://doi.org/10.1016/j.coviro.2021.12.008> (2022).
- 407 4 Letko, M., Seifert, S. N., Olival, K. J., Plowright, R. K. & Munster, V. J. Bat-borne virus diversity,  
408 spillover and emergence. *Nat Rev Microbiol* **18**, 461-471, doi:10.1038/s41579-020-0394-z  
409 (2020).
- 410 5 Ruiz-Aravena, M. *et al.* Ecology, evolution and spillover of coronaviruses from bats. *Nat Rev*  
411 *Microbiol*, doi:10.1038/s41579-021-00652-2 (2021).
- 412 6 Li, Y. *et al.* Virome of Bat Guano from Nine Northern California Roosts. *Journal of Virology* **95**,  
413 e01713-01720, doi:10.1128/JVI.01713-20 (2021).
- 414 7 Wu, Z. *et al.* Deciphering the bat virome catalog to better understand the ecological diversity of  
415 bat viruses and the bat origin of emerging infectious diseases. *The ISME Journal* **10**, 609-620,  
416 doi:10.1038/ismej.2015.138 (2016).
- 417 8 Simon-Loriere, E. & Holmes, E. C. Why do RNA viruses recombine? *Nature Reviews Microbiology*  
418 **9**, 617-626, doi:10.1038/nrmicro2614 (2011).
- 419 9 Cui, J., Li, F. & Shi, Z. L. Origin and evolution of pathogenic coronaviruses. *Nat Rev Microbiol* **17**,  
420 181-192, doi:10.1038/s41579-018-0118-9 (2019).
- 421 10 Plowright, R. K. *et al.* Ecological dynamics of emerging bat virus spillover. *Proc Biol Sci* **282**,  
422 20142124, doi:10.1098/rspb.2014.2124 (2015).
- 423 11 Shi, Y. *et al.* Spatial scale affects the relative role of stochasticity versus determinism in soil  
424 bacterial communities in wheat fields across the North China Plain. *Microbiome* **6**, doi:ARTN 27  
425 10.1186/s40168-018-0409-4 (2018).
- 426 12 Shi, M. *et al.* Redefining the invertebrate RNA virosphere. *Nature* **540**, 539-543,  
427 doi:10.1038/nature20167 (2016).
- 428 13 Zhou, P. *et al.* A pneumonia outbreak associated with a new coronavirus of probable bat origin.  
429 *Nature* **579**, 270-273, doi:10.1038/s41586-020-2012-7 (2020).



- 430 14 Zhou, H. *et al.* Identification of novel bat coronaviruses sheds light on the evolutionary origins  
431 of SARS-CoV-2 and related viruses. *Cell* **184**, 4380-4391.e4314,  
432 doi:<https://doi.org/10.1016/j.cell.2021.06.008> (2021).
- 433 15 Zhou, H. *et al.* A Novel Bat Coronavirus Closely Related to SARS-CoV-2 Contains Natural  
434 Insertions at the S1/S2 Cleavage Site of the Spike Protein. *Current Biology* **30**, 2196-2203.e2193,  
435 doi:<https://doi.org/10.1016/j.cub.2020.05.023> (2020).
- 436 16 Ge, X.-Y. *et al.* Isolation and characterization of a bat SARS-like coronavirus that uses the ACE2  
437 receptor. *Nature* **503**, 535-538, doi:10.1038/nature12711 (2013).
- 438 17 Hu, B. *et al.* Discovery of a rich gene pool of bat SARS-related coronaviruses provides new  
439 insights into the origin of SARS coronavirus. *PLOS Pathogens* **13**, e1006698,  
440 doi:10.1371/journal.ppat.1006698 (2017).
- 441 18 Peel, A. J. *et al.* Synchronous shedding of multiple bat paramyxoviruses coincides with peak  
442 periods of Hendra virus spillover. *Emerging Microbes & Infections* **8**, 1314-1323,  
443 doi:10.1080/22221751.2019.1661217 (2019).
- 444 19 Erickson, A. K. *et al.* Bacteria Facilitate Enteric Virus Co-infection of Mammalian Cells and  
445 Promote Genetic Recombination. *Cell Host Microbe* **23**, 77-88 e75,  
446 doi:10.1016/j.chom.2017.11.007 (2018).
- 447 20 Geoghegan, J. L., Duchene, S. & Holmes, E. C. Comparative analysis estimates the relative  
448 frequencies of co-divergence and cross-species transmission within viral families. *PLoS Pathog*  
449 **13**, e1006215, doi:10.1371/journal.ppat.1006215 (2017).
- 450 21 Plowright, R. K. *et al.* Pathways to zoonotic spillover. *Nat Rev Microbiol* **15**, 502-510,  
451 doi:10.1038/nrmicro.2017.45 (2017).
- 452 22 Streicker, D. G. *et al.* Host phylogeny constrains cross-species emergence and establishment of  
453 rabies virus in bats. *Science* **329**, 676-679, doi:10.1126/science.1188836 (2010).
- 454 23 Wu, F. *et al.* A new coronavirus associated with human respiratory disease in China. *Nature* **579**,  
455 265-269, doi:10.1038/s41586-020-2008-3 (2020).
- 456 24 Starr, T. N. *et al.* Deep Mutational Scanning of SARS-CoV-2 Receptor Binding Domain Reveals  
457 Constraints on Folding and ACE2 Binding. *Cell* **182**, 1295-1310.e1220,  
458 doi:10.1016/j.cell.2020.08.012 (2020).
- 459 25 Ogando, N. S. *et al.* SARS-coronavirus-2 replication in Vero E6 cells: replication kinetics, rapid  
460 adaptation and cytopathology. *Journal of General Virology* **101**, 925-940,  
461 doi:<https://doi.org/10.1099/jgv.0.001453> (2020).
- 462 26 Gussow, A. B. *et al.* Genomic determinants of pathogenicity in SARS-CoV-2 and other human  
463 coronaviruses. *Proceedings of the National Academy of Sciences* **117**, 15193-15199,  
464 doi:10.1073/pnas.2008176117 (2020).
- 465 27 Drosten, C. *et al.* Identification of a Novel Coronavirus in Patients with Severe Acute Respiratory  
466 Syndrome. *New England Journal of Medicine* **348**, 1967-1976, doi:10.1056/NEJMoa030747  
467 (2003).
- 468 28 Guan, Y. *et al.* Isolation and Characterization of Viruses Related to the SARS Coronavirus from  
469 Animals in Southern China. *Science* **302**, 276-278, doi:10.1126/science.1087139 (2003).
- 470 29 Gong, L. *et al.* A New Bat-HKU2-like Coronavirus in Swine, China, 2017. *Emerging Infectious  
471 Disease journal* **23**, 1607, doi:10.3201/eid2309.170915 (2017).
- 472 30 Zhou, P. *et al.* Fatal swine acute diarrhoea syndrome caused by an HKU2-related coronavirus of  
473 bat origin. *Nature* **556**, 255-258, doi:10.1038/s41586-018-0010-9 (2018).



- 474 31 Parashar, U., Gibson, C., Bresee, J. & Glass, R. Rotavirus and Severe Childhood Diarrhea.  
475 *Emerging Infectious Disease journal* **12**, 304, doi:10.3201/eid1202.050006 (2006).
- 476 32 Anderson, E. J. & Weber, S. G. Rotavirus infection in adults. *The Lancet Infectious Diseases* **4**, 91-  
477 99, doi:[https://doi.org/10.1016/S1473-3099\(04\)00928-4](https://doi.org/10.1016/S1473-3099(04)00928-4) (2004).
- 478 33 Thimmasandra Narayanappa, A. *et al.* A Novel Pathogenic Mammalian Orthoreovirus from  
479 Diarrheic Pigs and Swine Blood Meal in the United States. *mBio* **6**, e00593-00515,  
480 doi:10.1128/mBio.00593-15 (2015).
- 481 34 Jiang, R.-D. *et al.* Bat mammalian orthoreoviruses cause severe pneumonia in mice. *Virology*  
482 **551**, 84-92, doi:<https://doi.org/10.1016/j.virol.2020.05.014> (2020).
- 483 35 Li, D., Liu, C.-M., Luo, R., Sadakane, K. & Lam, T.-W. MEGAHIT: an ultra-fast single-node solution  
484 for large and complex metagenomics assembly via succinct de Bruijn graph. *Bioinformatics* **31**,  
485 1674-1676, doi:10.1093/bioinformatics/btv033 (2015).
- 486 36 Buchfink, B., Reuter, K. & Drost, H.-G. Sensitive protein alignments at tree-of-life scale using  
487 DIAMOND. *Nature Methods* **18**, 366-368, doi:10.1038/s41592-021-01101-x (2021).
- 488 37 Clewley, J. P. Macintosh sequence analysis software. *Molecular Biotechnology* **3**, 221-224,  
489 doi:10.1007/BF02789332 (1995).
- 490 38 Shi, M. *et al.* Total infectome characterization of respiratory infections in pre-COVID-19 Wuhan,  
491 China. *PLOS Pathogens* **18**, e1010259, doi:10.1371/journal.ppat.1010259 (2022).
- 492 39 Zhu, Y. *et al.* Clinical utility of a novel urine-based gene fusion TTTY15-USP9Y in predicting  
493 prostate biopsy outcome. *Urologic Oncology: Seminars and Original Investigations* **33**,  
494 384.e389-384.e320, doi:<https://doi.org/10.1016/j.urolonc.2015.01.019> (2015).
- 495 40 Katoh, K. & Standley, D. M. MAFFT Multiple Sequence Alignment Software Version 7:  
496 Improvements in Performance and Usability. *Molecular Biology and Evolution* **30**, 772-780,  
497 doi:10.1093/molbev/mst010 (2013).
- 498 41 Capella-Gutiérrez, S., Silla-Martínez, J. M. & Gabaldón, T. trimAl: a tool for automated  
499 alignment trimming in large-scale phylogenetic analyses. *Bioinformatics* **25**, 1972-1973,  
500 doi:10.1093/bioinformatics/btp348 (2009).
- 501 42 Guindon, S. & Gascuel, O. A Simple, Fast, and Accurate Algorithm to Estimate Large Phylogenies  
502 by Maximum Likelihood. *Systematic Biology* **52**, 696-704, doi:10.1080/10635150390235520  
503 (2003).
- 504 43 Lole Kavita, S. *et al.* Full-Length Human Immunodeficiency Virus Type 1 Genomes from Subtype  
505 C-Infected Seroconverters in India, with Evidence of Intersubtype Recombination. *Journal of*  
506 *Virology* **73**, 152-160, doi:10.1128/JVI.73.1.152-160.1999 (1999).
- 507 44 Sali, A. Comparative protein modeling by satisfaction of spatial restraints. *Molecular Medicine*  
508 *Today* **1**, 270-277, doi:[https://doi.org/10.1016/S1357-4310\(95\)91170-7](https://doi.org/10.1016/S1357-4310(95)91170-7) (1995).
- 509 45 Lan, J. *et al.* Structure of the SARS-CoV-2 spike receptor-binding domain bound to the ACE2  
510 receptor. *Nature* **581**, 215-220, doi:10.1038/s41586-020-2180-5 (2020).
- 511 46 Shen, M.-y. & Sali, A. Statistical potential for assessment and prediction of protein structures.  
512 *Protein Science* **15**, 2507-2524, doi:<https://doi.org/10.1110/ps.062416606> (2006).
- 513 47 Jo, S., Kim, T., Iyer, V. G. & Im, W. CHARMM-GUI: A web-based graphical user interface for  
514 CHARMM. *Journal of Computational Chemistry* **29**, 1859-1865,  
515 doi:<https://doi.org/10.1002/jcc.20945> (2008).
- 516 48 Huang, J. *et al.* CHARMM36m: an improved force field for folded and intrinsically disordered  
517 proteins. *Nature Methods* **14**, 71-73, doi:10.1038/nmeth.4067 (2017).

- 518 49 Jorgensen, W. L., Chandrasekhar, J., Madura, J. D., Impey, R. W. & Klein, M. L. Comparison of  
519 simple potential functions for simulating liquid water. *The Journal of Chemical Physics* **79**, 926-  
520 935, doi:10.1063/1.445869 (1983).
- 521 50 Abraham, M. J. *et al.* GROMACS: High performance molecular simulations through multi-level  
522 parallelism from laptops to supercomputers. *SoftwareX* **1-2**, 19-25,  
523 doi:<https://doi.org/10.1016/j.softx.2015.06.001> (2015).
- 524 51 Temmam, S. *et al.* Bat coronaviruses related to SARS-CoV-2 and infectious for human cells.  
525 *Nature* **604**, 330-336, doi:10.1038/s41586-022-04532-4 (2022).
- 526 52 Bonomi, M. *et al.* Promoting transparency and reproducibility in enhanced molecular  
527 simulations. *Nature Methods* **16**, 670-673, doi:10.1038/s41592-019-0506-8 (2019).
- 528 53 Schymkowitz, J. *et al.* The FoldX web server: an online force field. *Nucleic Acids Research* **33**,  
529 W382-W388, doi:10.1093/nar/gki387 (2005).
- 530 54 Schrödinger, L. L. C.. The PyMOL Molecular Graphics System, Version 1.8 (2015).
- 531 55 R. C. Team. R: A Language and Environment for Statistical Computing (2022).
- 532 56 Csárdi, G. & Nepusz, T. The igraph software package for complex network research (2006).
- 533 57 Goslee, S. C. & Urban, D. L. The ecodist Package for Dissimilarity-based Analysis of Ecological  
534 Data. *Journal of Statistical Software* **22**, 1 - 19, doi:10.18637/jss.v022.i07 (2007).
- 535

## 536 **ACKNOWLEDGMENTS**

537 We thank the Alibaba Cloud Computing Co. Ltd. for providing the computational resources for  
538 rapid data processing, and the local Centers for Disease Control and Prevention in six trapping  
539 sites for their assistance in specimen collection.

540 MS was supported by Shenzhen Science and Technology Program  
541 (KQTD20200820145822023), Guangdong Province “Pearl River Talent Plan” Innovation and  
542 Entrepreneurship Team Project (2019ZT08Y464), and Health and Medical Research Fund  
543 (COVID190206). YF was supported by the National Natural Science Foundation of China  
544 (3156004), Yunnan Reserve Talents for Academic and Technical Leaders of Middle-Aged and  
545 Young People (2019HB052), Jianguo Xu Academician Workstation (NO. 2018IC155). ECH  
546 was supported by an Australian Research Council Australia Laureate Fellowship  
547 (FL170100022) and by InnoHK funding from the Innovation and Technology Commission of  
548 Hong Kong. GDL was supported by United States National Institutes of Health U01 AI151810.

549

## 550 **AUTHOR CONTRIBUTIONS**

551 Conceptualization, E.C.H., Y.F., and M.S.; Methodology, J.W., Y.-F.P., W.-H.Y., C.-M.L., W.-  
552 C.W., B.L., Y.-L.S., D.-Y.G., G.-D.L., J.L., Y.F., E.C.H., and M.S.; Investigation, J.W., Y.-F.P.,  
553 L.-F.Y., W.-H.Y, C.-M.L., J.W., G.-P.K., W.-C.W., Q.-Y.G., G.-Y.X., H.-L.L., Y.-Q.C. E.C.H.,  
554 Y.F., and M.S.; Writing – Original Draft, Y.-F.P.; Writing – Review and Editing, J.W., Y.-F.P.,  
555 L.-F.Y., W.-H.Y, C.-M.L., J.W., G.-P.K., W.-C.W., Q.-Y.G., G.-Y.X., H.-L.L., Y.-Q.C., Y.-L.S.,  
556 D.-Y.G., Z.-H.G., G.-D.L., J.L., E.C.H. and M.S. Funding Acquisition, J.L., Y.F. and M.S.;

557 Resources (sampling), L.-F.Y., W.-H.Y., Z.-H.G., G.-D.L., and Y.F.; Resources  
558 (computational), J.L., E.C.H., and M.S.; Supervision, Z.-H.G., G.-D.L., E.C.H., Y.F., and M.S..  
559

560 **COMPETING INTERESTS**

561 The authors declare no competing interests.

562 **FIGURES**

563

**A**

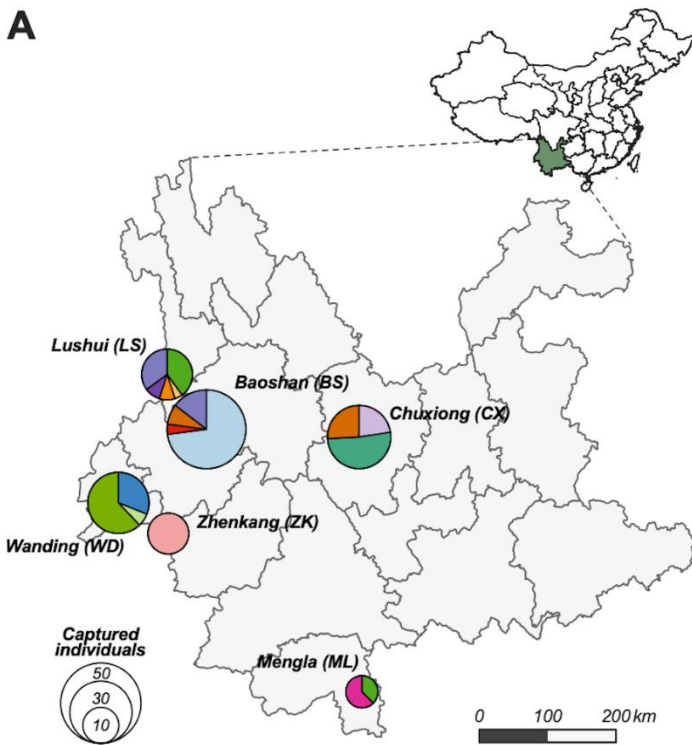

**B**

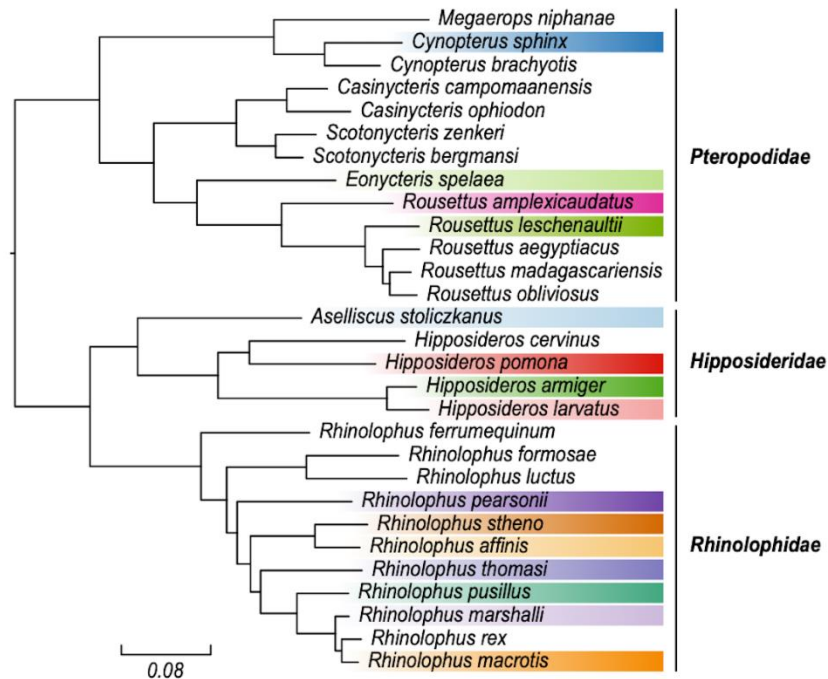

564

565

566 **Fig. 1 | Overview of the samples analysed in this study.** (A) Locations in Yunnan province  
567 China where bat samples were taken. Pie charts indicate the composition of bat species  
568 sampled at each location, while the total area of the pies are proportional to number of  
569 captured individuals. Colours indicate different bat species, which are consistent with the  
570 colouring scheme in plot B. (B) Phylogeny of bats, including those sampled as part of this  
571 study. The tree was estimated using nucleotide sequences of bat COI gene utilising a  
572 maximum likelihood (ML) method. Coloured strips indicate the bat species sampled in this  
573 study.

574

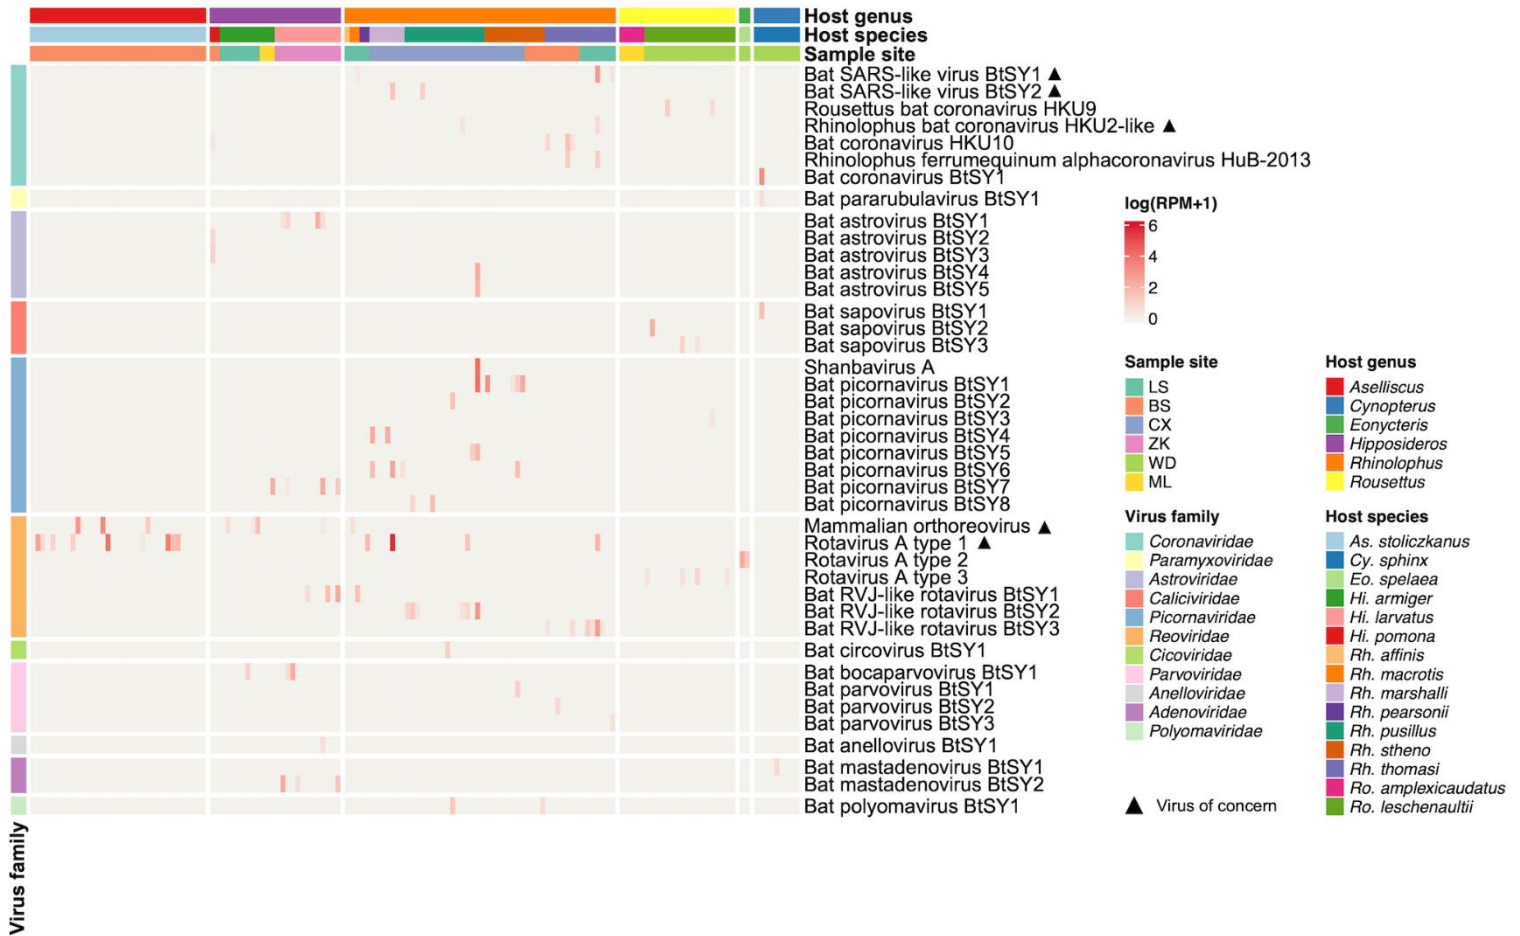

575

576 **Fig. 2 | Characterization of the mammal-associated virome of bats.** The heatmap displays  
 577 the distribution and abundance of mammal-associated viruses in individual bats. Each column  
 578 represents an individual bat, while each row represents a virus species. The abundance of  
 579 viruses in each individual is represented as a logarithm of the number of mapped reads per  
 580 million total reads (RPM). Sampling site, host taxonomy (species and genus) and virus  
 581 taxonomy are shown as coloured strips at top and left, respectively. Black triangle marks  
 582 indicate “viruses of concern”, defined as those that are closely related to known human or  
 583 livestock pathogens (>90% amino acid similarity in RNA-dependent RNA polymerase).

584



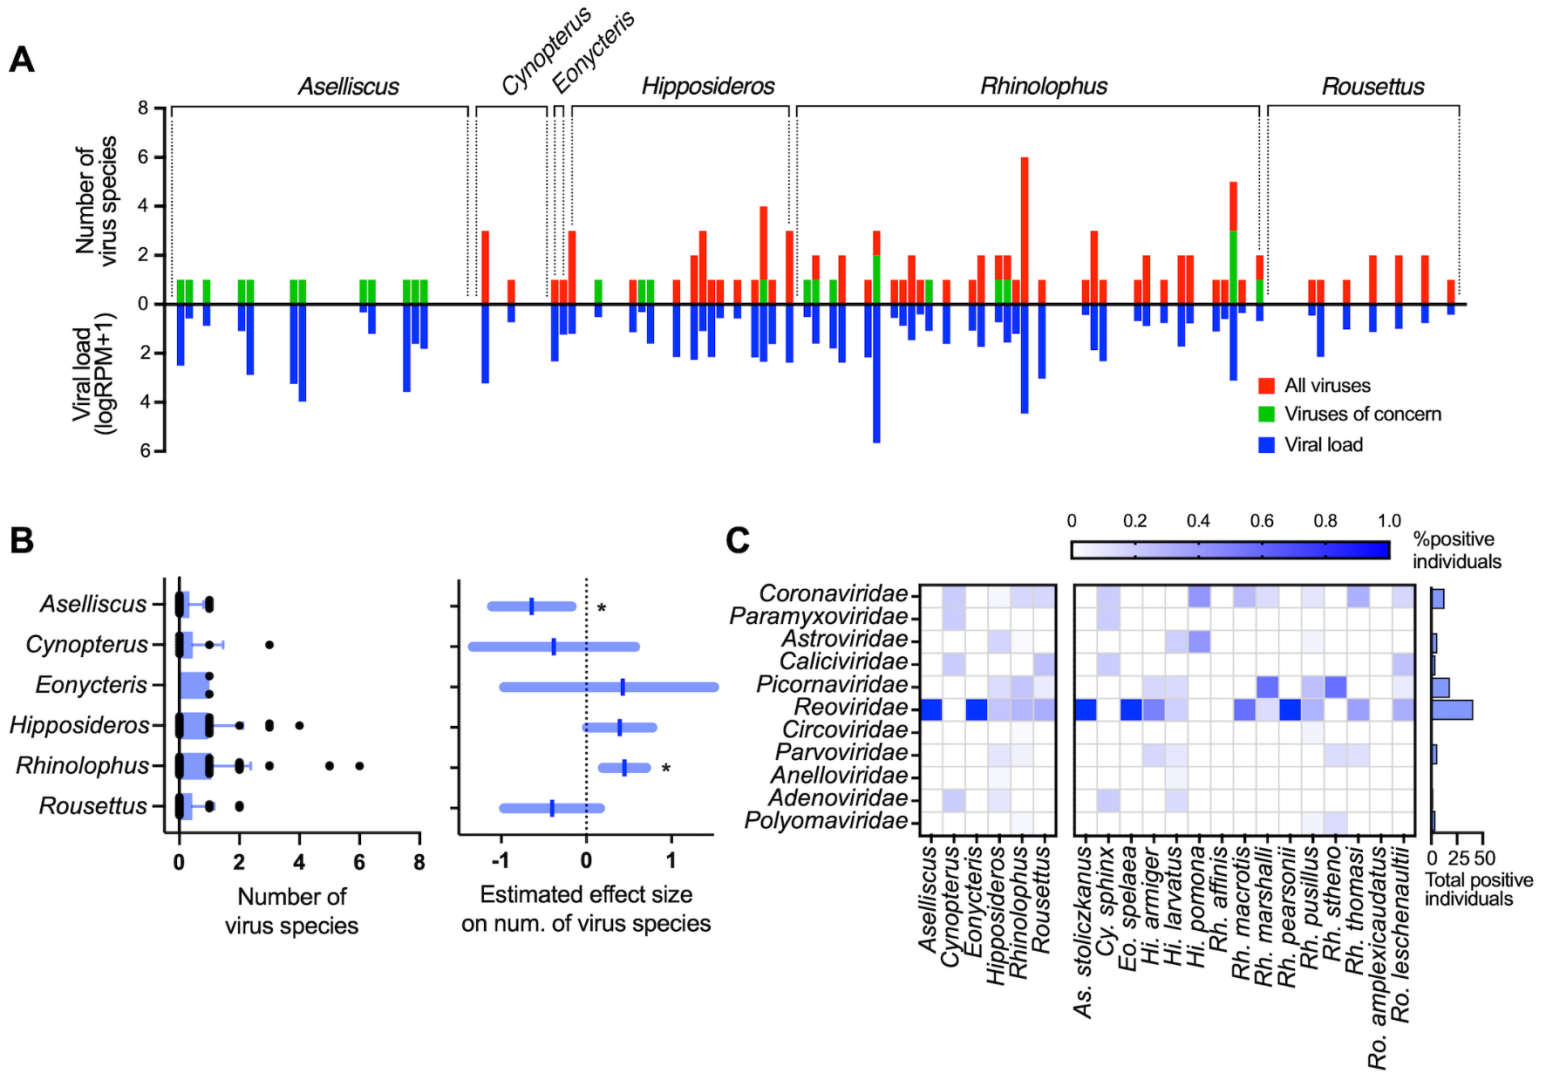

585

586 **Fig. 3 | Comparison of mammal-associated virus diversity among different bat taxa. (A)**  
 587 Virus load and the number of virus species in individual bats. Red bars, the total number of  
 588 mammal-associated viruses per host. Green bars, number of viruses of concern per host. Blue  
 589 bars represent viral load per host as logarithm of the sum of total viral RPM. **(B)** Left,  
 590 comparison of the number of viruses per individual host among six bat genera (mean+SD).  
 591 Right, estimated effect size of each bat genus on the number of virus species per individual bat  
 592 by Poisson regression (mean±95%CI). Stars indicate significant effects (in which zero is not  
 593 included in the 95%CI). **(C)** Comparison of the prevalence of 11 viral families among different  
 594 host genera (left block) and species (right block).

595



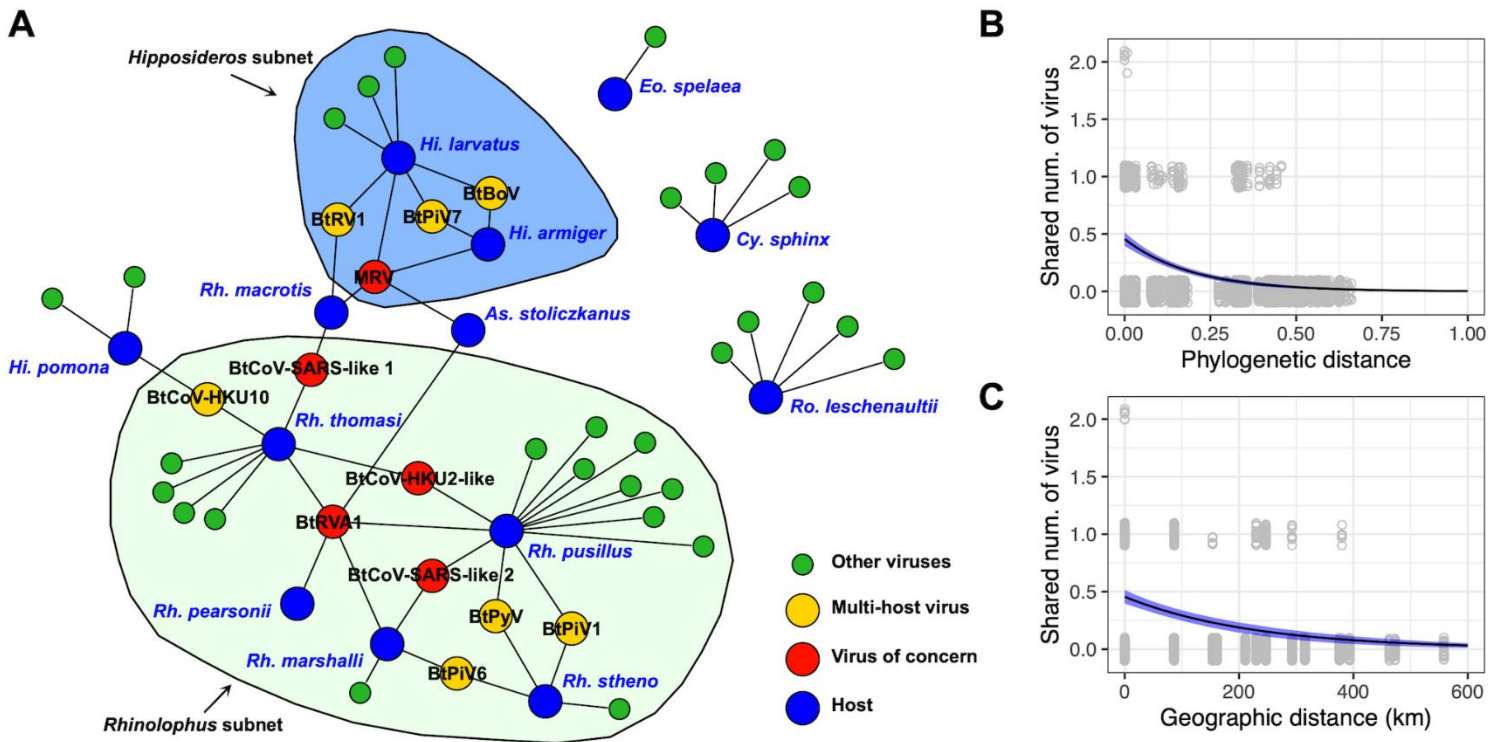

596

597 **Fig. 4 | The virus-sharing network of bats.** (A) The virus-sharing network reveals  
598 connectivity among viromes of different bat taxa. Viruses of concern and putative cross-  
599 species transmissions are shown in different colours. Two network modules (subnets) were  
600 detected with a network betweenness-based criterion and are visualised by coloured areas.  
601 (B, C) The relationship between the number of shared viruses with phylogenetic (B) or  
602 geographic distance (C) between pairs of host individuals. Phylogenetic distance is calculated  
603 as the sum of phylogenetic tree branch length between a pair of hosts, and the tree was  
604 estimated with nucleotide sequences of the COI gene employing a maximum likelihood  
605 method. The line and blue area is the estimated partial effect and standard error of  
606 phylogenetic or geographic distance by Poisson regression.

607

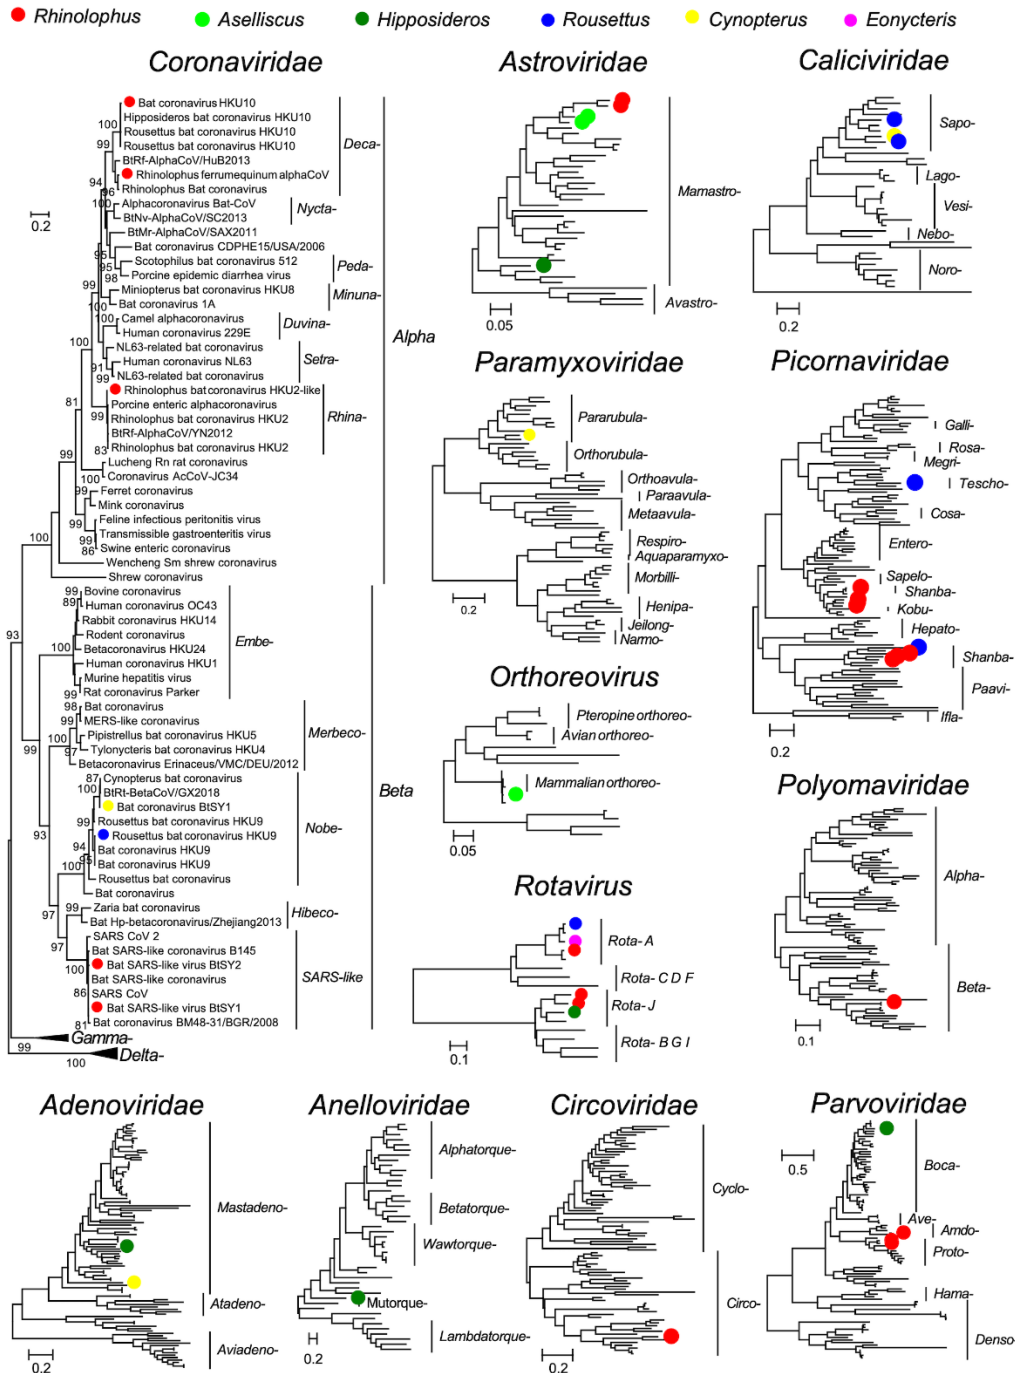

608

609 **Fig. 5 | Evolutionary relationships of 11 viral families detected in our study.** Phylogenetic  
 610 trees were estimated using a maximum likelihood method based on conserved replicase  
 611 protein (RNA viruses: RdRp, *Polyomaviridae*: LTag, *Anelloviridae*: ORF1 protein, *Parvoviridae*:  
 612 NS1, and other DNA viruses: DNA pol). Trees were midpoint rooted, and the branch length  
 613 indicates number of nucleotide substitutions per site. Dots indicate viruses detected in our  
 614 samples, and colours represent host genus.

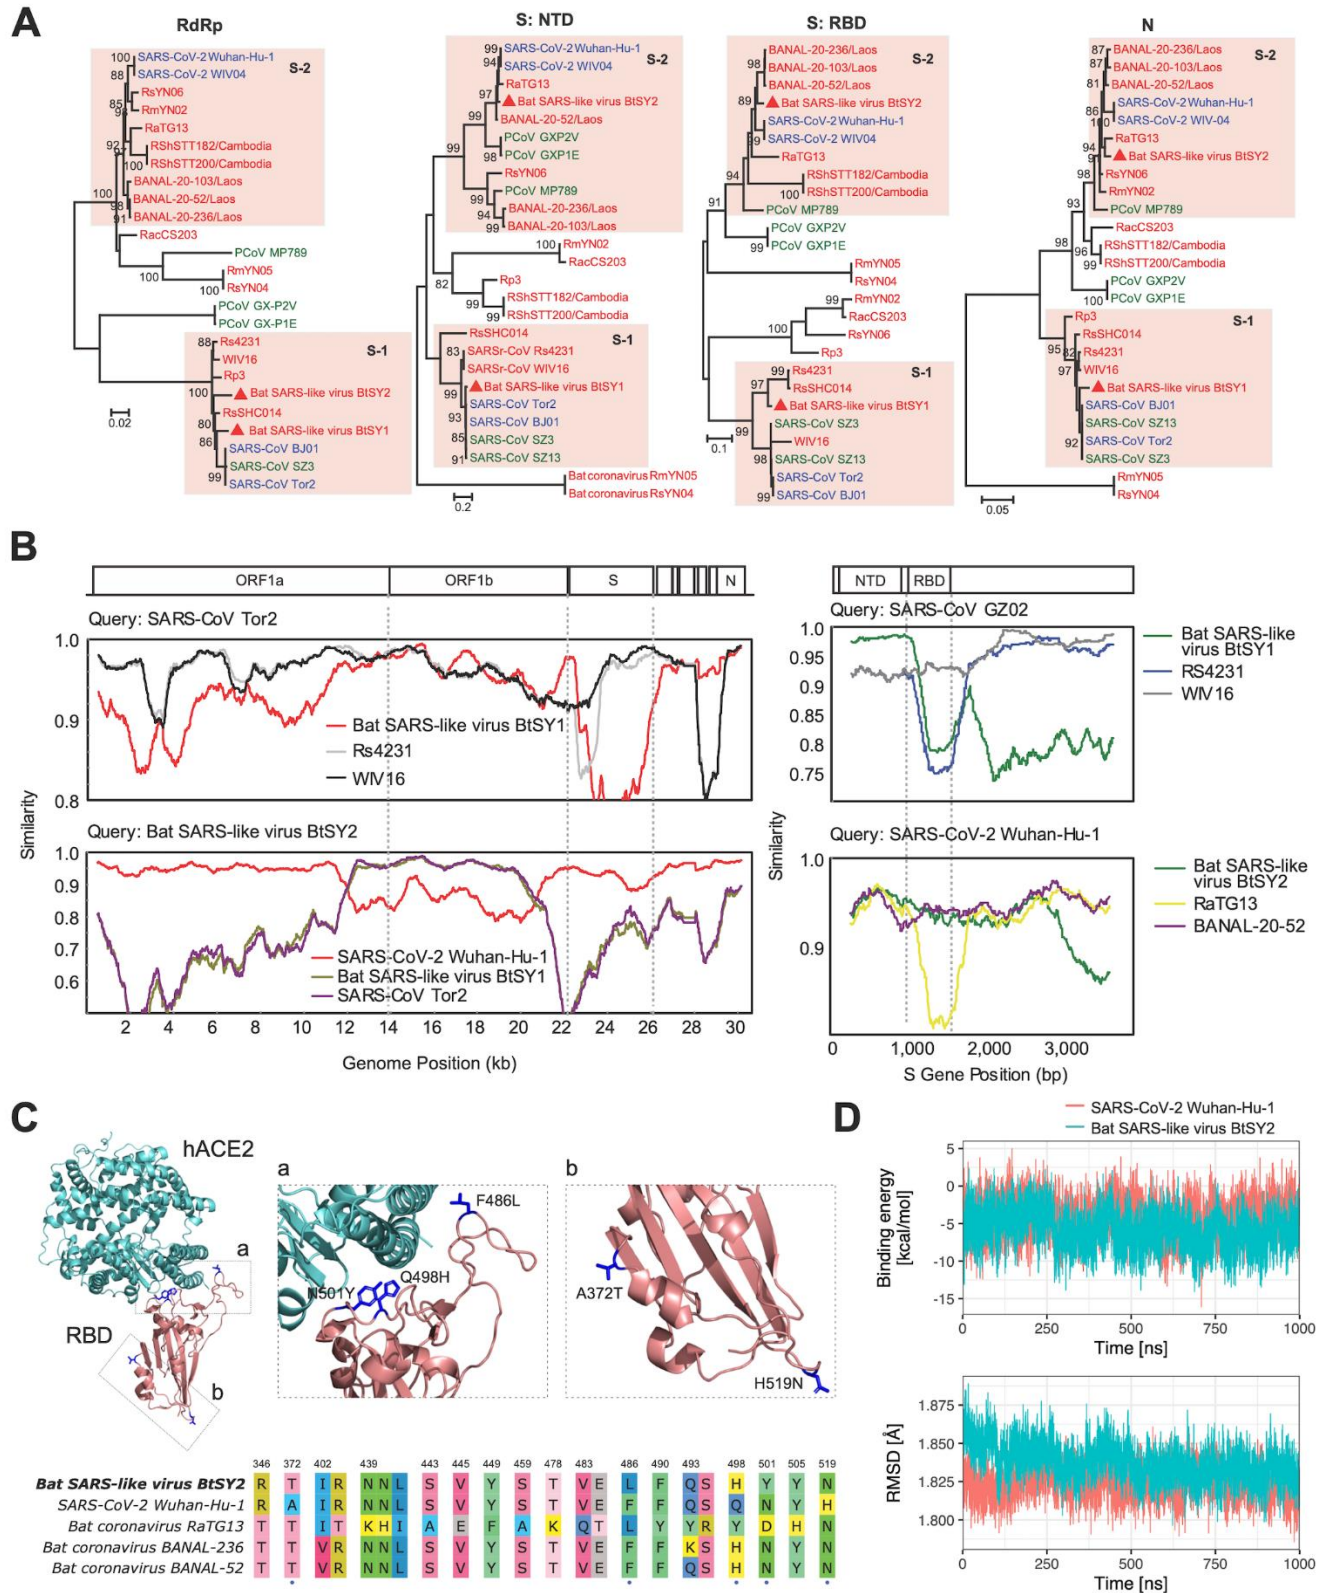

615

616

617

**Fig. 6 | Phylogenetic and structural analysis of a potentially zoonotic SARS-related coronavirus detected in our samples. (A) Phylogenetic trees of four key functional genes of**

618 SARS-related coronaviruses. Colours of virus strain names indicate the host taxa where the  
619 viruses were detected. Red: bats, blue: human, green: others. **(B)** Recombination analysis of  
620 SARS-related coronaviruses at the whole genome and spike protein scales. **(C)** Top,  
621 homology-modelling structure of the receptor-binding domain (RBD) of Bat SARS-like virus  
622 BtSY2 in complex with human angiotensin-converting enzyme 2 (hACE2). Blue-coloured  
623 residues on RBD indicate amino-acid substitutions compared with SARS-CoV-2 Wuhan-Hu-1.  
624 Bottom, alignment of RBD sequences (residues T333 to G526 of spike protein) of Bat SARS-  
625 like virus BtSY2, SARS-CoV-2 Wuhan-Hu-1 and two closely related bat coronavirus. Only  
626 polymorphic sites are shown. The five amino acid differences in the RBD of Bat SARS-like  
627 virus BtSY2 compared with SARS-CoV-2 Wuhan-Hu-1 are marked with blue dots. **(D)**  
628 Molecular dynamics simulation results of stability (top) and binding energy (bottom) of Bat  
629 SARS-like virus BtSY2 RBD-hACE2 complex. BtSY1 and BtSY2 are abbreviations for Bat  
630 SARS-like virus BtSY1 and BtSY2, respectively.  
631  
632

633 **Supplementary Materials**

634 Supplementary figures S1 ~ S4

635 Supplementary tables S1 ~ S5

636
